# Supplementary material for: PPARβ/δ-dependent MSC metabolism determines their immunoregulatory properties
Source: PubMed Central journal article supplement (PMC7351754; doi:10.1038/s41598-020-68347-x), 2020-07-10
Supplement: 41598_2020_68347_MOESM1_ESM.pdf [file 41598_2020_68347_MOESM1_ESM.pdf]

## PPAR $\beta$ / $\delta$ -dependent MSC metabolism determines their immunoregulatory properties

### *Authors:*

Contreras-Lopez RA<sup>1,6#</sup>, Elizondo-Vega R<sup>4#</sup>, Torres MJ<sup>7</sup>, Vega-Letter AM<sup>1</sup>, Luque-Campos N<sup>1,6</sup>, Paredes-Martinez MJ<sup>1</sup>, Pradenas C<sup>1</sup>, Tejedor G<sup>3</sup>, Oyarce K<sup>5</sup>, Salgado M<sup>4</sup>, Jorgensen C<sup>3</sup>, Khoury M<sup>2</sup>, Kronke G<sup>8</sup>, Garcia-Robles MA<sup>4</sup>, Altamirano C<sup>7</sup>, Luz-Crawford P<sup>1\*</sup> and Djouad F<sup>3\*</sup>

### *Affiliations:*

<sup>1</sup>Centro de Investigación Biomédica, Facultad de Medicina, Universidad de los Andes, Santiago, Chile; <sup>2</sup>Cells for Cells, Universidad de los Andes, Santiago, Chile; <sup>3</sup>IRMB, Univ Montpellier, INSERM, Montpellier, France; <sup>4</sup>Facultad de Ciencias Biológicas, Departamento de Biología Celular, Laboratorio de Biología Celular, Concepción, Chile; <sup>5</sup>Facultad de Ciencias de la Salud, Universidad San Sebastián, Concepción, Chile.  
; <sup>6</sup>Facultad de Medicina, Universidad de los Andes, Santiago, Chile; <sup>7</sup>Escuela de Ingeniería Bioquímica, Valparaíso, Chile; <sup>8</sup>Department of Internal Medicine 3, University of Erlangen-Nuremberg, Erlangen 91054, Germany;

# and \* Equally contributing author

**Keywords:** *Mesenchymal Stem Cell, Metabolism, reprogramming, glycolytic, immunoregulation*

### *Correspondence to:*

Farida Djouad, Inserm U 1183, IRMB, Hôpital Saint-Eloi, 80 avenue Augustin Fliche,  
34295 Montpellier cedex 5, France

Tel: 33 (0) 4 67 33 04 75 – E-mail: [farida.djouad@inserm.fr](mailto:farida.djouad@inserm.fr)

Patricia Luz-Crawford, Centro de Investigación Biomédica, Facultad de Medicina,  
Universidad de los Andes, Santiago, Chile.

Tel: 56 (2) 26181481 – E-mail: [pluz@uandes.cl](mailto:pluz@uandes.cl)

# Supplementary 1

**A**

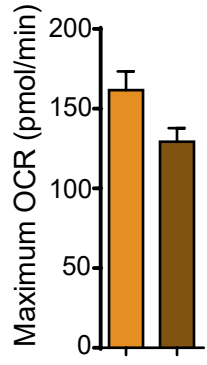

**B**

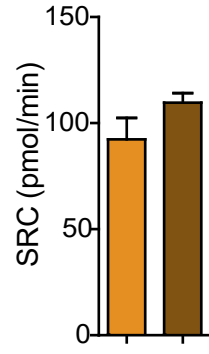

**C**

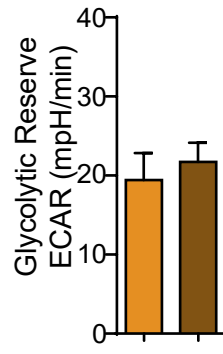

■ MSC  $PPAR\beta/\delta^{+/+}$   
■ MSC  $PPAR\beta/\delta^{-/-}$

**Supplementary Figure 1. PPAR $\beta$ / $\delta$  expression induces an OXPHOS dependent metabolism on murine MSC. (A-C)** The metabolic status of PPAR $\beta$ / $\delta$ <sup>+/+</sup> or PPAR $\beta$ / $\delta$ <sup>-/-</sup> MSC was determined by analyzing the maximum oxygen consumption rates (OCR) **(A)**, the spare respiratory capacity (SRC) **(B)** and the glycolytic reserve **(C)** using the Agilent Seahorse XF technology. Results are represented as mean  $\pm$  SD of at least 4 independent experiments.

# Supplementary 2

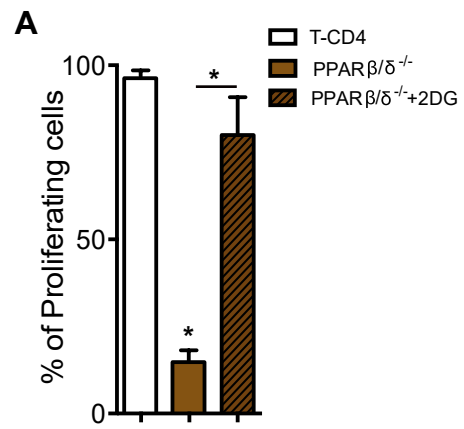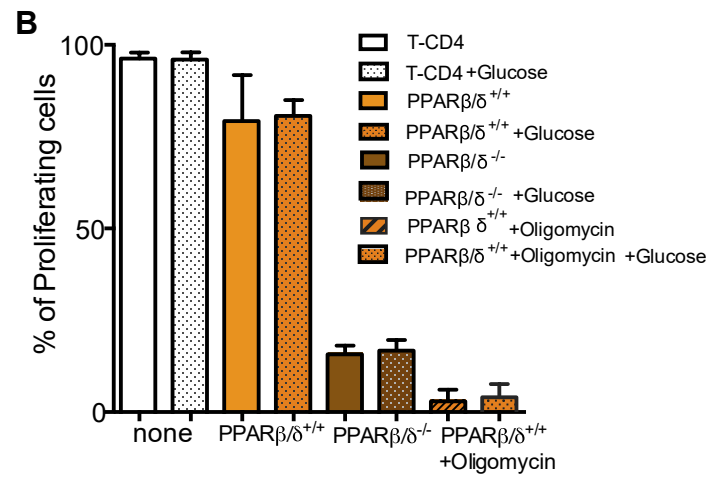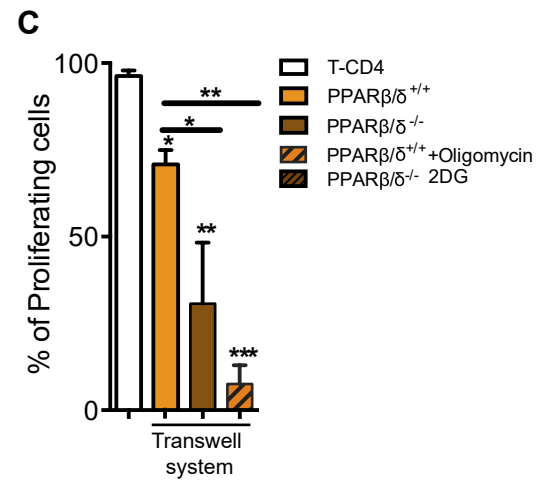

**Supplementary Figure 2. Glucose addition in the culture media do not modify MSC immunosuppressive properties.** **(A)** Naïve T-CD4 murine cells labelled with Cell Trace Violet (CTV) were cultured with MSC PPAR $\beta$ / $\delta^{-/-}$  pre-treated (brown bars) or not (lined brown bars) with 2DG. **(B)** Naïve T-CD4 murine cells were labelled with Cell Trace Violet (CTV) prior to be activated. Then, the cells were cultured alone (white bars) or with either MSC PPAR $\beta$ / $\delta^{+/+}$  pre-treated (lined yellow bars) or not (yellow bars) with oligomycin or MSC PPAR $\beta$ / $\delta^{-/-}$  (brown bars). Glucose was added when indicated in the culture media at 25mM (white and colored bars with dot). **(C)** Naïve T-CD4 murine cells labelled with Cell Trace Violet (CTV) were cultured alone (white bars) or with MSC PPAR $\beta$ / $\delta^{+/+}$  pre-treated (lined yellow bars) or not (yellow bars) with oligomycin or MSC PPAR $\beta$ / $\delta^{-/-}$  (brown bars) using a transwell system. Proliferation, was evaluated by FACS. Statistics: non-paired Kruskal-Wallis test.
